# Supplementary material for: Associations of Various Nighttime Noise Exposure Indicators with Objective Sleep Efficiency and Self-Reported Sleep Quality: A Field Study
Source: PubMed Central journal article supplement (PMC6843841; doi:10.3390/ijerph16203790), 2019-10-09
Supplement: ijerph-16-03790-s001.pdf [file ijerph-16-03790-s001.pdf]

# A panel study on various noise exposure measures on objective and self-reported sleep quality

Martin Rööslī<sup>1,2,\*</sup>, Mark Brink<sup>3</sup>, Franziska Rudzik<sup>4</sup>, Christian Cajochen<sup>5</sup>, Martina S. Ragettli<sup>1,2</sup>, Benjamin Flückiger<sup>1,2</sup>, Reto Pieren<sup>6</sup>, Danielle Vienneau<sup>1,2</sup>, Jean-Marc Wunderli<sup>6</sup>

**Table S1: Pearson correlation matrix of sleep outcomes. Positive correlations are highlighted in green, negative correlations in orange**

|                          | AW sleep efficiency | AW sleep latency | AW sleep duration | AW moving time | SR sleep quality | SR sleepiness |
|--------------------------|---------------------|------------------|-------------------|----------------|------------------|---------------|
| AW sleep efficiency [%]  | 1.00                |                  |                   |                |                  |               |
| AW sleep latency [min]   | -0.79               | 1.00             |                   |                |                  |               |
| AW sleep duration [h]    | 0.26                | -0.10            | 1.00              |                |                  |               |
| AW moving time [%]       | -0.12               | 0.07             | 0.10              | 1.00           |                  |               |
| SR sleep quality [0-100] | 0.25                | -0.24            | 0.01              | -0.20          | 1.00             |               |
| SR sleepiness [1-9]      | -0.19               | 0.19             | -0.01             | 0.07           | -0.48            | 0.00          |

**Table S2: Summary of IR exposure data**

| Exposure metric     | N   | Mean | SD   | Min | Max  |
|---------------------|-----|------|------|-----|------|
| IR <sub>23-07</sub> | 685 | 60.2 | 21.1 | 0.0 | 97.4 |
| IR <sub>19-23</sub> | 685 | 59.5 | 21.0 | 1.7 | 98.4 |
| IR <sub>23-01</sub> | 685 | 61.0 | 24.2 | 0.0 | 99.1 |
| IR <sub>01-05</sub> | 685 | 56.0 | 25.7 | 0.0 | 98.9 |
| IR <sub>05-06</sub> | 685 | 54.7 | 23.6 | 0.0 | 95.4 |
| IR <sub>06-07</sub> | 685 | 54.1 | 23.3 | 0.3 | 99.0 |

**Table S3: Pearson correlation matrix for measured night time noise exposure metrics: Leq and IR at different time window. Positive correlations are highlighted in green.**

|           | Leq 23-07 | Leq 19-23 | Leq 23-01 | Leq 01-05 | Leq 05-06 | Leq 06-07 | IR 23-07 | IR 19-23 | IR 23-01 | IR 01-05 | IR 05-06 | IR 06-07 |
|-----------|-----------|-----------|-----------|-----------|-----------|-----------|----------|----------|----------|----------|----------|----------|
| Leq 23-07 | 1         |           |           |           |           |           |          |          |          |          |          |          |
| Leq 19-23 | 0.81      | 1         |           |           |           |           |          |          |          |          |          |          |
| Leq 23-01 | 0.86      | 0.78      | 1         |           |           |           |          |          |          |          |          |          |
| Leq 01-05 | 0.86      | 0.72      | 0.79      | 1         |           |           |          |          |          |          |          |          |
| Leq 05-06 | 0.88      | 0.76      | 0.70      | 0.82      | 1         |           |          |          |          |          |          |          |
| Leq 06-07 | 0.89      | 0.72      | 0.63      | 0.70      | 0.87      | 1         |          |          |          |          |          |          |
| IR 23-07  | 0.19      | 0.16      | 0.16      | -0.03     | -0.04     | 0.17      | 1        |          |          |          |          |          |
| IR 19-23  | -0.10     | 0.13      | -0.15     | -0.21     | -0.15     | -0.05     | 0.63     | 1        |          |          |          |          |
| IR 23-01  | 0.18      | 0.23      | 0.26      | -0.02     | 0.06      | 0.14      | 0.77     | 0.57     | 1        |          |          |          |
| IR 01-05  | 0.45      | 0.44      | 0.38      | 0.42      | 0.40      | 0.43      | 0.59     | 0.35     | 0.64     | 1        |          |          |
| IR 05-06  | 0.30      | 0.32      | 0.22      | 0.22      | 0.34      | 0.35      | 0.61     | 0.47     | 0.59     | 0.69     | 1        |          |
| IR 06-07  | 0.11      | 0.06      | 0.00      | -0.05     | -0.06     | 0.21      | 0.81     | 0.56     | 0.45     | 0.37     | 0.54     | 1        |

**Figure S1: Scatter plots of raw outcome data in relation to nighttime outdoor noise exposure (Leq,night); ACT =Actiwatch; SR=Self reported**

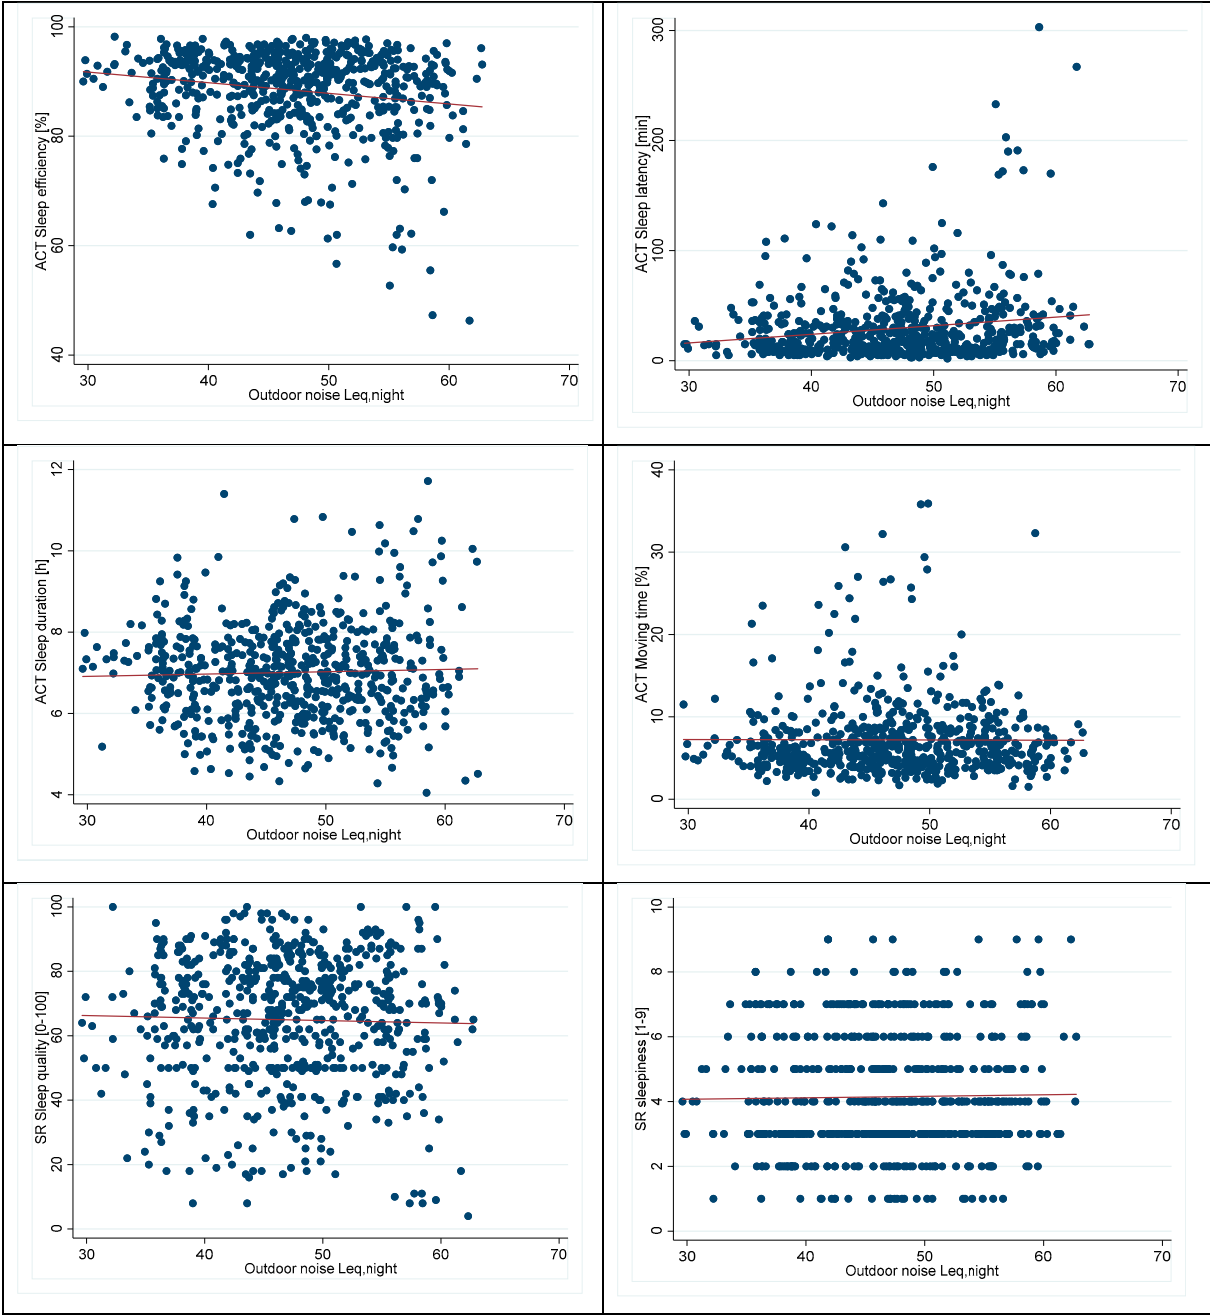

**Table S4: Associations between all outcomes and IR<sub>night</sub> calculated from the outdoor noise measurements per 10% increase in IR; ACT =Actiwatch; SR=Self reported**

| <b>Outcome</b>           | <b>N</b> | <b>Coefficient</b> | <b>Confidence interval</b> | <b>p-value</b> |
|--------------------------|----------|--------------------|----------------------------|----------------|
| ACT Sleep efficiency [%] | 634      | 0.02               | -0.26 to 0.30              | 0.90           |
| ACT Sleep latency [min]  | 634      | -0.73              | -1.86 to 0.39              | 0.20           |
| ACT Sleep duration [h]   | 634      | -0.03              | -0.09 to 0.04              | 0.39           |
| ACT Moving time [%]      | 634      | -0.01              | -0.17 to 0.15              | 0.89           |
| SR Sleep quality [0-100] | 639      | -0.18              | -1.11 to 0.76              | 0.71           |
| SR sleepiness [1-9]      | 633      | 0.01               | -0.07 to 0.09              | 0.79           |

<sup>1</sup> adjusted for L<sub>eq,night</sub>, age, sex, education, evening caffeine intake, evening alcohol consumption, evening screen time, day of the week, season and whether woken up by an alarm clock
